# Supplementary material for: A hierarchical emulsion system stabilized by soyasaponin emulsion droplets
Source: Royal Society of Chemistry journal article supplement (doi:10.1039/d1fo01607e), 2021-01-01
Supplement: d1fo01607e1.pdf [file d1fo01607e1.pdf]

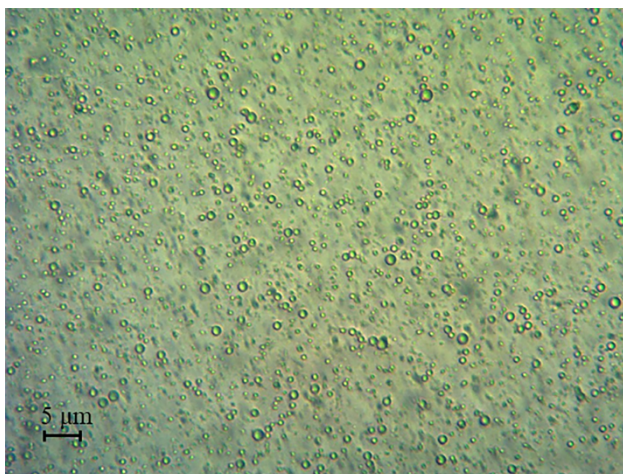

Fig.S1 Microscope image of an O/W emulsion with a Ssa concentration of 2.5%. The sample is diluted 10 times and the magnification is 40×.

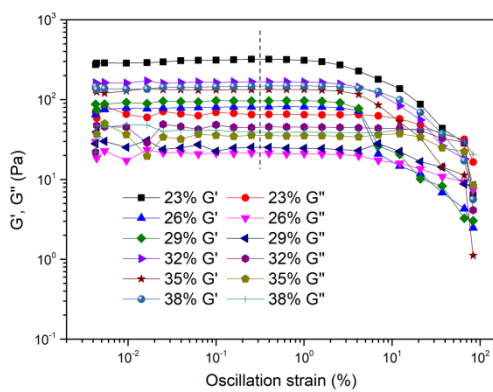

Fig.S2 Strain sweep of hierarchical emulsion at 25 °C (a fixed frequency of 1 Hz).
